# Supplementary material for: Key role of quorum‐sensing mutations in the development of Staphylococcus aureus clinical device‐associated infection
Source: PubMed Central journal article supplement (PMC8989080; doi:10.1002/ctm2.801), 2022-04-07
Supplement: CTM2-12-e801-s001.pdf [file CTM2-12-e801-s001.pdf]

**Supporting Table 1. Clinical case characteristics**

| Case number | Patient sex | Patient age | Diagnosis                                                       | Fixture        | Surgery Date  | Medication history                                                                                                                                                                                                                                                                                                                                                                       | T1/T2 isolation Date          |
|-------------|-------------|-------------|-----------------------------------------------------------------|----------------|---------------|------------------------------------------------------------------------------------------------------------------------------------------------------------------------------------------------------------------------------------------------------------------------------------------------------------------------------------------------------------------------------------------|-------------------------------|
| 1           | Male        | 58          | Postoperative infection, right radius fracture                  | Plate, screw   | 2016/June     | 2017/6/30-2017/7/10 Vancomycin 1g/q12h iv and Levofloxacin 0.5g/qd iv                                                                                                                                                                                                                                                                                                                    | T1 2017/6/26                  |
| 2           | Male        | 40          | Postoperative infection, right ankle fracture                   | Plate, screw   | 2016/8/31     | 2017/10/23-2017/10/23 Levofloxacin 0.5g/qd iv and Gentamicin 80000u/q12h iv<br>2016/9/14-16 Clindamycin 0.25g/q12h iv<br>2016/9/14-26 Levofloxacin 0.5g/qd iv                                                                                                                                                                                                                            | T2 2017/10/24<br>T1 2016/9/14 |
| 3           | Male        | 36          | Postoperative infection after, repair of left cruciate ligament | Screw          | 2017/7/28     | 2017/8/16-18 Levofloxacin 0.5g/qd iv<br>2017/7/25-27 Clindamycin 0.25g/q12h iv<br>2017/9/13-18 Clindamycin 0.25g/q12h iv<br>2017/9/18-25 Levofloxacin 0.5g/qd iv                                                                                                                                                                                                                         | T2 2017/8/17<br>T1 2017/9/14  |
| 4           | Male        | 65          | Postoperative infection, left foot fracture                     | Kirschner wire | 2016/February | 2017/11/26-12/13 Levofloxacin 0.5g/qd iv<br>2017/11/27-30 Vancomycin 1g/q12h iv<br>2018/12/1-22 Cefotiam 0.5g/qd iv<br>2018/12/5-22 Levofloxacin 0.5g/qd iv                                                                                                                                                                                                                              | T2 2017/11/29<br>T1 2018/12/1 |
| 5           | Male        | 76          | Postoperative infection, right tibiofibular fracture            | Plate, screw   | 2017/8/8      | 2019/1/18-28 Cefotiam 2g/q12h iv<br>2019/1/30-02/03 Levofloxacin 0.5g/qd iv<br>2019/1/30-02/03 Ceftazidime 1.5g/q12h iv<br>2019/2/14-03/05 Moxifloxacin 0.4g/qd iv<br>2019/2/14-18 Vancomycin 1g/q12h iv<br>2017/6/10-13 Levofloxacin 0.5g/qd iv<br>2017/6/13-19 Moxifloxacin 0.4g/qd iv<br>2018/7/03-05 Levofloxacin 0.5g/qd iv<br>2018/7/05-11 Cefoperazone and Sulbactam 1.5g/q12h iv | T2 2019/1/31<br>T1 2018/7/4   |
| 6           | Male        | 32          | Postoperative infection, right tibial fracture                  | Plate, screw   | 2014/December | 2019/4/12-17 Levofloxacin 0.5g/qd iv<br>2019/4/17-24 Vancomycin 1g/q12h iv<br>2017/12/21-23 Clindamycin 0.25g/q12h iv<br>2017/12/21-23 Levofloxacin 0.5g/qd iv                                                                                                                                                                                                                           | T2 2019/4/12<br>T1 2017/12/22 |
|             |             |             |                                                                 |                |               | 2018/5/31-06/11 Aztreonam 1g/q12h iv                                                                                                                                                                                                                                                                                                                                                     | T2 2018/6/1                   |
