# Supplementary material for: Key role of quorum‐sensing mutations in the development of Staphylococcus aureus clinical device‐associated infection
Source: PubMed Central journal article supplement (PMC8989080; doi:10.1002/ctm2.801), 2022-04-07
Supplement: CTM2-12-e801-s003.pdf [file CTM2-12-e801-s003.pdf]

**Supporting Table 2. Non-synonymous substitutions in sequential clinical isolates**

| Case        | Location of mutation (gene) | Base change       | Type of mutation   | Amino acid exchange       |                  |
|-------------|-----------------------------|-------------------|--------------------|---------------------------|------------------|
| Case 1      | <i>istA</i>                 | C364T             | Missense           | Pro122Ser                 |                  |
|             | <i>xkdX</i>                 | T124A             | Missense           | Phe42Ile                  |                  |
|             | <i>sdrD</i>                 | 3911_3912delinsGC | Deletion-insertion | Asp1304Gly                |                  |
|             |                             | C3596T            | Missense           | Ser1199Leu                |                  |
|             | <i>coa</i>                  | G1773C            | Missense           | Lys591Asn                 |                  |
|             | <i>rnfC</i>                 | T452C             | Missense           | Val151Ala                 |                  |
|             |                             | G403A             | Missense           | Ala135Thr                 |                  |
|             |                             | C398T             | Missense           | Ala133Val                 |                  |
|             | <i>arsR2</i>                | A4T               | Missense           | Thr2Ser                   |                  |
|             |                             | T46C              | Missense           | Ser16Pro                  |                  |
|             | <i>arsB</i>                 | A303G             | Missense           | Ile101Met                 |                  |
|             | <i>abgT</i>                 | G1356A            | Missense           | Met452Ile                 |                  |
|             | <i>agrC</i>                 | 83insT            | Insertion          | Frameshift                |                  |
|             | Case 2                      | <i>istA</i>       | C364T              | Missense                  | Pro122Ser        |
| <i>sdrD</i> |                             | T3596C            | Missense           | Leu1199Ser                |                  |
|             |                             | G3857A            | Missense           | Gly1286Asp                |                  |
| <i>lpl</i>  |                             | G1369A            | Missense           | Asp457Asn                 |                  |
| <i>yhcN</i> |                             | C131A             | Missense           | Thr44Lys                  |                  |
|             |                             | G290A             | Missense           | Ser97Asn                  |                  |
| <i>agrC</i> |                             | 358delT           | Deletion           | Frameshift                |                  |
| <i>clfB</i> |                             | C2260T            | Missense           | Leu754Phe                 |                  |
| <i>cstA</i> |                             | A769G             | Missense           | Ile257Val                 |                  |
| Case 3      |                             | <i>sdrC</i>       | 872insTAGCGA       | Insertion                 | Frameshift       |
|             | <i>M013TW_1443</i>          | 675_676delinsGT   | Deletion-insertion | Leu226Val                 |                  |
|             | <i>M013TW_1444</i>          | 663_664delinsTG   | Deletion-insertion | Asn221_Asp222delinsLysTyr |                  |
|             | <i>terL</i>                 | 1461_1462delinsCA | Deletion-insertion | Asn488Asp                 |                  |
|             | <i>M013TW_1441</i>          | A244T             | Missense           | Thr82Ser                  |                  |
|             | <i>agrC</i>                 | 453insT           | Insertion          | Frameshift                |                  |
|             | <i>M013TW_2107</i>          | G970A             | Missense           | Val324Ile                 |                  |
|             | <i>sasG</i>                 | A2789G            | Missense           | Lys930Arg                 |                  |
|             | Case 4                      | <i>clfB</i>       | 1827_1831delATTCA  | Deletion                  | Phe610frameshift |
|             |                             | <i>agrC</i>       | A58C               | Missense                  | Met20Leu         |
|             |                             | 62_63delinsAC     | Deletion-insertion | Phe21Tyr                  |                  |
|             |                             | 64_65delinsTT     | Deletion-insertion | Thr22Leu                  |                  |
| Case 5      | <i>clfB</i>                 | A1915C            | Missense           | Ile639Leu                 |                  |
|             | <i>agrA</i>                 | A37T              | Missense           | Arg13Stop                 |                  |
| Case 6      | <i>arcC</i>                 | 94_95delAT        | Deletion           | Met32frameshift           |                  |
|             | <i>agrC</i>                 | C256T             | Missense           | Ile23Phe                  |                  |
